# Supplementary material
Source: publisher site journal article supplement (https://www.dovepress.com/article/supplementary_file/518589/518589-Revised-Supplementary-Table-1.xlsx)
Supplement: Supplementary file 1 [file 518589-Revised-Supplementary-Table-1.xlsx]

## Sheet: Sheet1
Supplementary Table 1 Information on primers used in this study
Primer		5'-3'
H-FH	Forward Primer	TGGGAATCCAGGCCAATAC
	Reverse Primer	GCTGCCTTGTCATACCCTAT
M-Fh1	Forward Primer	ATTGGAGGTGCTACGGAACG
	Reverse Primer	ACCTTCAGCTACCTCATCTGC
H-IFNB1	Forward Primer	ATGGTGGTCCGAGCAGAGAT
	Reverse Primer	CCACCACTCATTCTGAGGCA
H-Mx1	Forward Primer	TCTGAGGAGAGCCAGACGAT
	Reverse Primer	ACTCTGGTCCCCAATGACAG
H-Areg	Forward Primer	TGGATTGGACCTCAATGACA
	Reverse Primer	AGCCAGGTATTTGTGGTTCG
H-IL6	Forward Primer	CCCCAATTTCCAATGCTCTCC
	Reverse Primer	CGCACTAGGTTTGCCGAGTA
H-IL1b	Forward Primer	AGCTACGAATCTCCGACCAC
	Reverse Primer	CGTTATCCCATGTGTCGAAGAA
H-TNFα	Forward Primer	CCTCTCTCTAATCAGCCCTCTG
	Reverse Primer	GAGGACCTGGGAGTAGATGAG
H-actin	Forward Primer	CATGTACGTTGCTATCCAGGC
	Reverse Primer	CTCCTTAATGTCACGCACGAT
M-IL6	Forward Primer	CCCCAATTTCCAATGCTCTCC
	Reverse Primer	CGCACTAGGTTTGCCGAGTA
M-IL1b	Forward Primer	TCAAATCTCGCAGCAGCACATC
	Reverse Primer	CGTCACACACCAGCAGGTTATC
M-TNFα	Forward Primer	GTGCCTATGTCTCAGCCTCTTCTC
	Reverse Primer	GTTTGTGAGTGTGAGGGTCTGG
M-actin	Forward Primer	GTCCACCGCAAATGCTTCTA
	Reverse Primer	TGCTGTCACCTTCACCGTTC
